# Supplementary material for: All inkjet-printed graphene-based conductive patterns for wearable e-textile applications
Source: Royal Society of Chemistry journal article supplement (doi:10.1039/c7tc03669h), 2017-01-01
Supplement: c7tc03669h1.pdf [file c7tc03669h1.pdf]

## All Inkjet-printed Graphene-based Conductive Pattern for Wearable E-textiles Applications

Nazmul Karim<sup>1,4\*</sup>, Shaila Afroj<sup>2</sup>, Andromachi Malandraki<sup>2</sup>, Sean Butterworth<sup>2</sup>, Christopher Beach<sup>3</sup>, Muriel Rigout<sup>4</sup>, Kostya S. Novoselov<sup>1</sup>, Alexander J. Casson<sup>3</sup> and Stephen G. Yeates<sup>2</sup>

<sup>1</sup>The National Graphene Institute (NGI), The University of Manchester, Booth Street East, M13 9PL, Manchester, UK

<sup>2</sup>School of Chemistry, The University of Manchester, Oxford Road, M13 9PL, Manchester, UK

<sup>3</sup>School of EEE, The University of Manchester, Oxford Road, M13 9PL, Manchester, UK

<sup>4</sup>School of Materials, The University of Manchester, Oxford Road, M13 9PL, Manchester, UK

\*Corresponding author E-mail: [mdnazmul.karim@manchester.ac.uk](mailto:mdnazmul.karim@manchester.ac.uk)

**Keywords:** graphene, wearables, e-textiles, and inkjet printing

### Supplementary Information

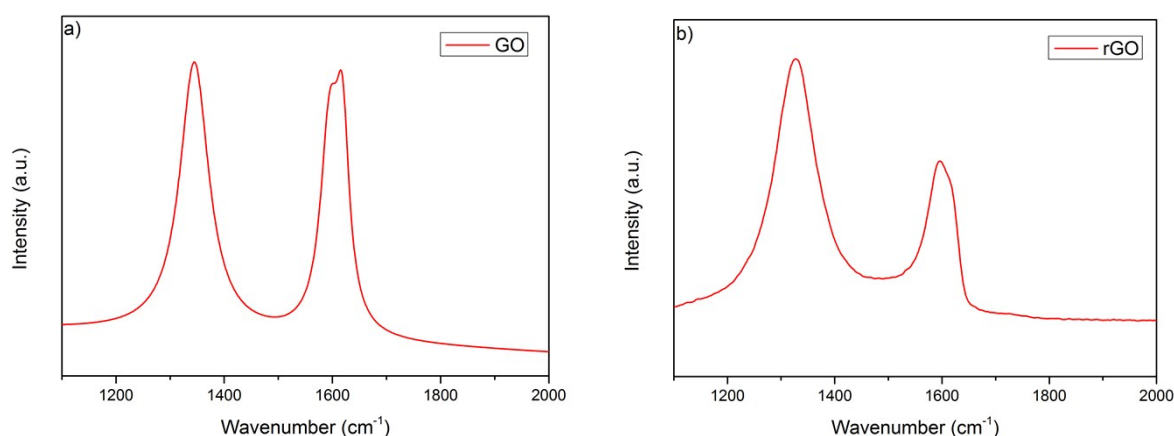

**Fig S1** Raman spectra of a) GO and b) rGO shows the intensity ratio of D to G band ( $I_D/I_G$ ) was increased due to the significant reduction of GO to rGO.

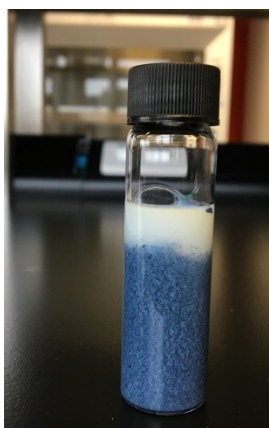

**Fig S2** The combination of NP1 and rGO ink demonstrates incompatibility of these two inks.

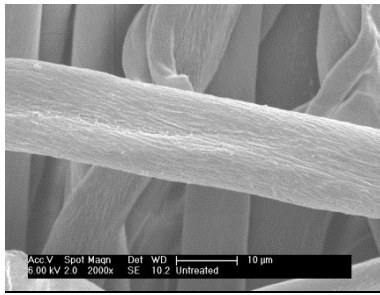

(a)

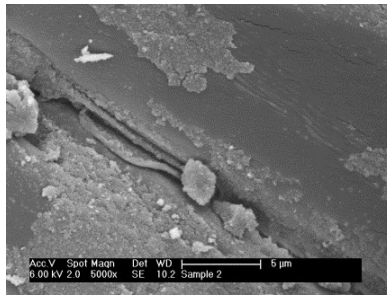

(b)

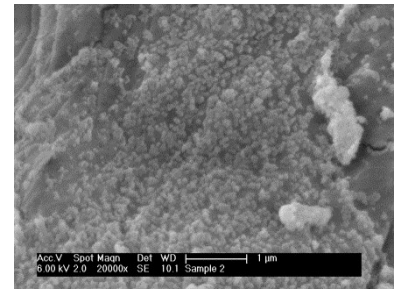

(c)

**Fig S3** SEM images of untreated and NP1 inkjet printed cotton fabrics: (a) untreated cotton ( $\times 2000$ ); (b) NP1 inkjet printed Cotton ( $\times 5000$ ) and (c) NP1 (12 layers) inkjet printed Cotton ( $\times 20000$ ). SEM image of untreated cotton fabric shows a very smooth and featureless surface as expected; however after printing with 12 layers (12L) NP1 nanoparticles, the treated surface displays nano or micro-roughness with a fairly homogenous distribution of nanoparticles. Also some interfibre bonding was observed at the fabric interface.

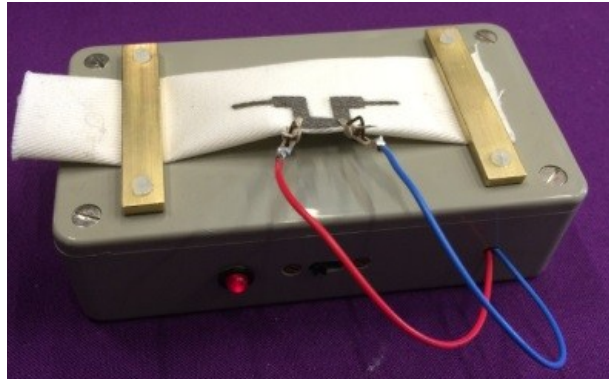

**Fig S4** A LED light connected to a NP1 and rGO printed conductive textile and power supply

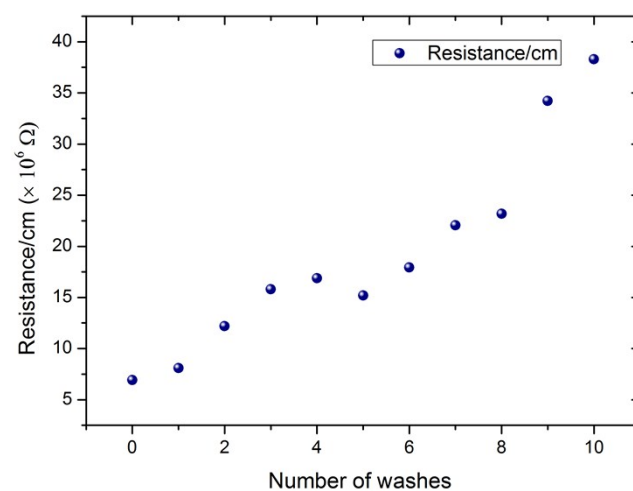

**Fig. S5** The wash satbility (the change in resiatnce/cm) of all inkjet-printed graphene track on NP1 printed cotton textiles for for ECG application.
